# Supplementary material for: Integrated Metabolo-Proteomic Approach to Decipher the Mechanisms by Which Wheat QTL (Fhb1) Contributes to Resistance against Fusarium graminearum
Source: PLOS journal article supplement (doi:10.1371/journal.pone.0040695), 2012-07-12
Supplement: S3 (10.1371/journal.pone.0040695.s003) [file journal.pone.0040695.s003]

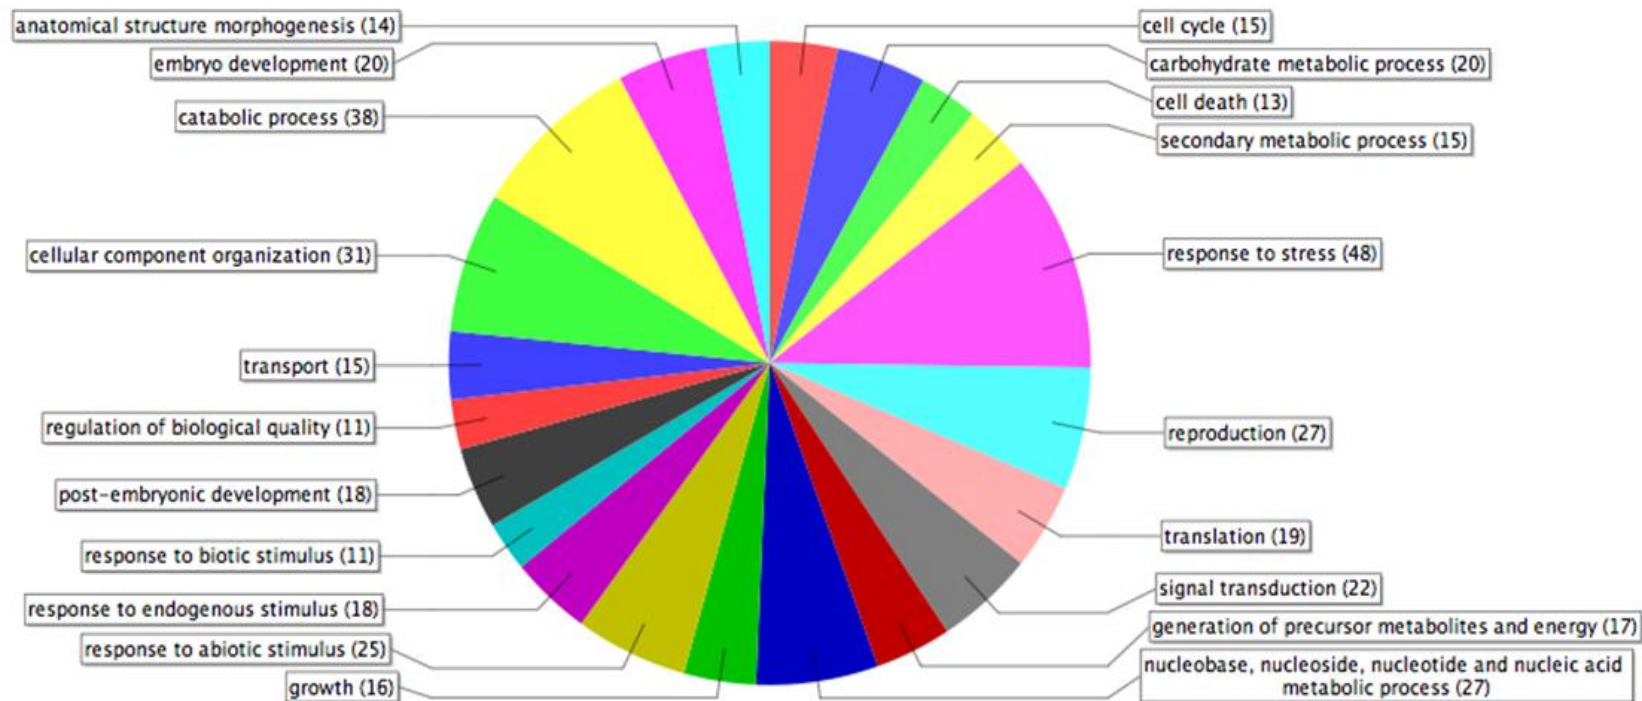

**Fig. S3** Resistant related induced (RRI) proteins in wheat NIL with resistant *Fhb1* allele following *F. graminearum* inoculation.
